# Supplementary material for: The Role of Life Stages in the Sensitivity of Hediste diversicolor to Nanoplastics: A Case Study with Poly(Methyl)Methacrylate (PMMA)
Source: MDPI journal article supplement (doi:10.3390/toxics12050352), 2024-05-10
Supplement: s1 [file s1]

Supporting Information for

## The Role of Life Stages in the Sensitivity of *Hediste diversicolor* to Nanoplastics: A Case Study with Poly(Methyl)Methacrylate (PMMA)

Beatriz Neves <sup>1</sup>, Miguel Oliveira <sup>2</sup>, Carolina Frazão <sup>2</sup>, Mónica Almeida <sup>2</sup>, Ricardo J. B. Pinto <sup>3</sup>,  
Etelvina Figueira <sup>2</sup> and Adília Pires <sup>2,\*</sup>

<sup>1</sup> Department of Biology, University of Aveiro, 3810-193 Aveiro, Portugal

<sup>2</sup> Centre for Environmental and Marine Studies, Department of Biology, University of Aveiro, 3810-193 Aveiro, Portugal

<sup>3</sup> CICECO-Aveiro Institute of Materials, Department of Chemistry, University of Aveiro, 3810-193 Aveiro, Portugal

\* Correspondence: adilia@ua.pt

| PMMA particles              |                        | 0h           | 24h          | 48h           | 72h          | 96h          |
|-----------------------------|------------------------|--------------|--------------|---------------|--------------|--------------|
| <b>Ultrapure Water</b>      | Hydrodynamic size (nm) | 1678 ± 138.4 | 2542 ± 172.0 | 928.4 ± 25.68 | 1848 ± 170.0 | 1557 ± 92.40 |
|                             | Polydispersity Index   | 0.724        | 0.911        | 0.569         | 0.835        | 0.877        |
| <b>Artificial Sea water</b> | Hydrodynamic size (nm) | 5780 ± 178.7 | 5574 ± 646.0 | 5030 ± 129.5  | 5968 ± 926.7 | 2987 ± 285.6 |
|                             | Polydisperse Index     | 0.934        | 0.959        | 0.682         | 0.797        | 0.402        |

**Table S1** – Characterization of PMMA particles in terms of hydrodynamic size and polydispersity at different time points. Data are presented as mean ± standard deviation.
